# Supplementary material
Source: PubMed Central journal article supplement (PMC6551783)
Supplement: ASN.2018040362SupplementaryData1.pdf [file ASN.2018040362SupplementaryData1.pdf]

## Supplemental Material

### Supplemental Figures

Supp. Figure 1. *Drosophila* nephrocytes express C3G.

Supp. Figure 2. Rap1 is necessary for nephrocyte function.

Supp. Figure 3. Anti-Sns antibody specifically recognizes Sns.

Supp. Figure 4. Activated Nephrin recruits C3G.

Supp. Figure 5. Nephrin activation results in Integrin  $\beta$ 1 activation (additional data).

Supp. Figure 6. C3G knockout in human podocytes.

### Supplemental Tables

Supp. Table 1. *Guide RNA (gRNA)* sequences employed for generation of C3G knockout podocytes by *CRISPR/Cas9* technology.

Supp. Table 2. Genes identified to be necessary for nephrocyte function.

Supp. Table 3. Nomenclature of mouse Nephrin tyrosine (Y) residues.

## Supplemental Figures

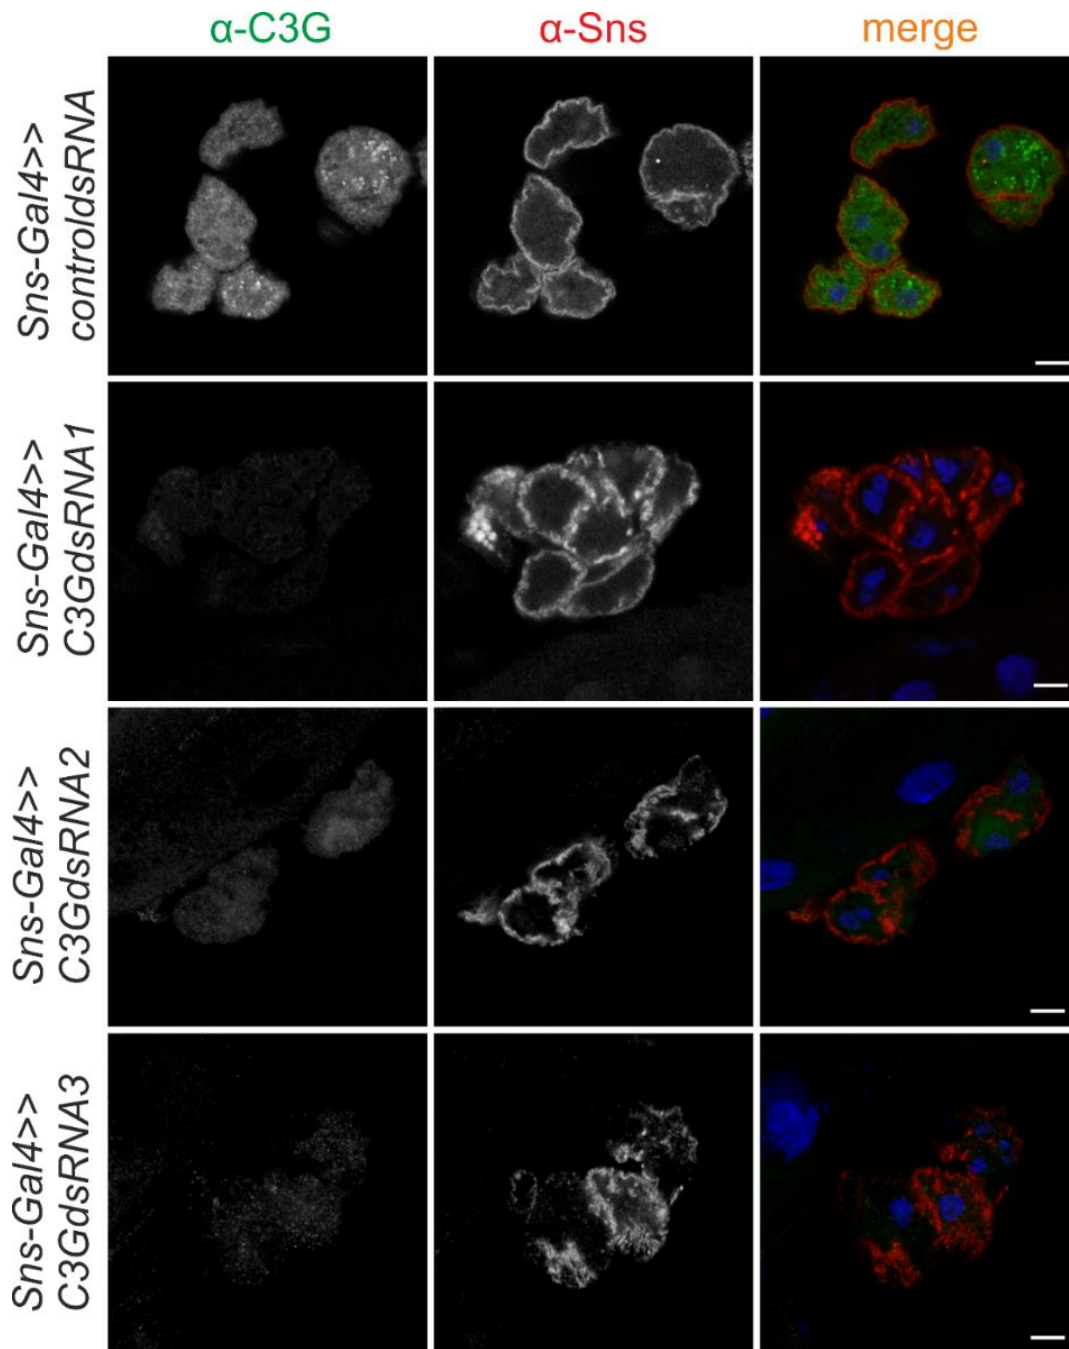

### Supp. Figure 1. *Drosophila* nephrocytes express C3G.

Immunofluorescence analysis of control (*dsRNA* for *or83b*) or *c3g* knockdown nephrocytes are shown (*c3gdsRNA1-3*). Knockdown in nephrocytes was accomplished by employing *sns-GAL4*. Nephrocytes were prepared and immunofluorescence analysis was performed with antibody specific for C3G (green) and Sns (red). Scale bar: 10  $\mu$ m. n=3.

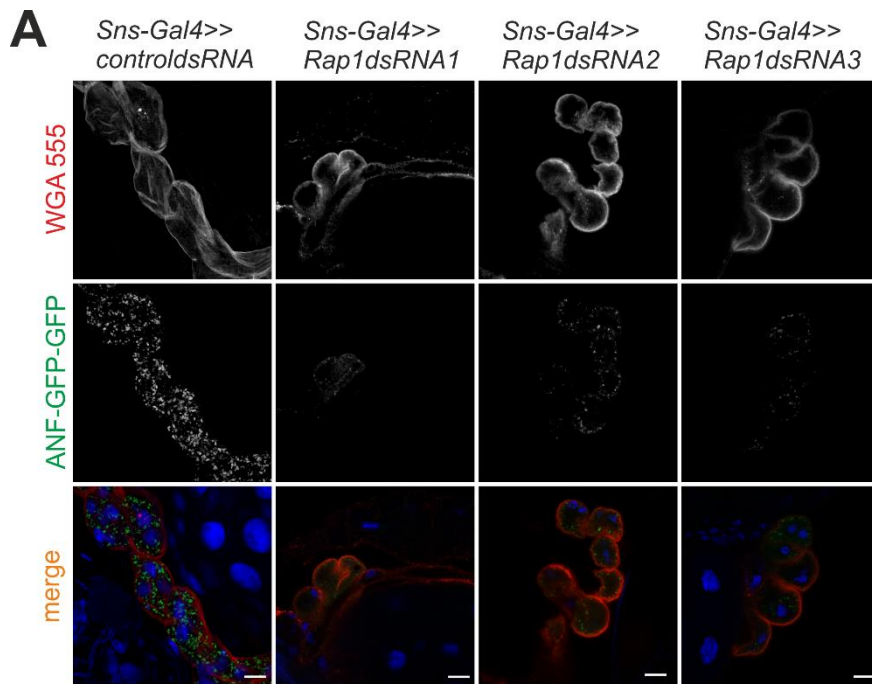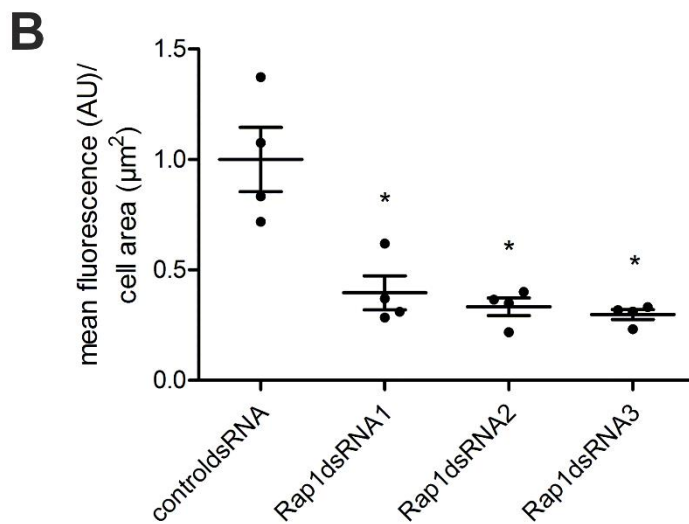

**Supp. Figure 2. Rap1 is necessary for nephrocyte function.**

(A) Uptake of secreted ANF-GFP-GFP into nephrocytes is shown in prepared control (RNAi for *or83b*) or *rap1* knockdown nephrocytes. Knockdown in nephrocytes was accomplished by employing *sns-Gal4*. Samples were stained with wheat germ agglutinin-Alexa<sup>555</sup> (WGA) to visualize membranes. Merged images are shown in the lower panel. Scale bar: 10 µm. (B) Accumulation of ANF-GFP-GFP into nephrocytes was quantified. Shown are means and SEM in AU (arbitrary units) per µm<sup>2</sup> cell area normalized to control condition. \*  $P < .05$  by unpaired two-tailed Mann-Whitney test. n=4.

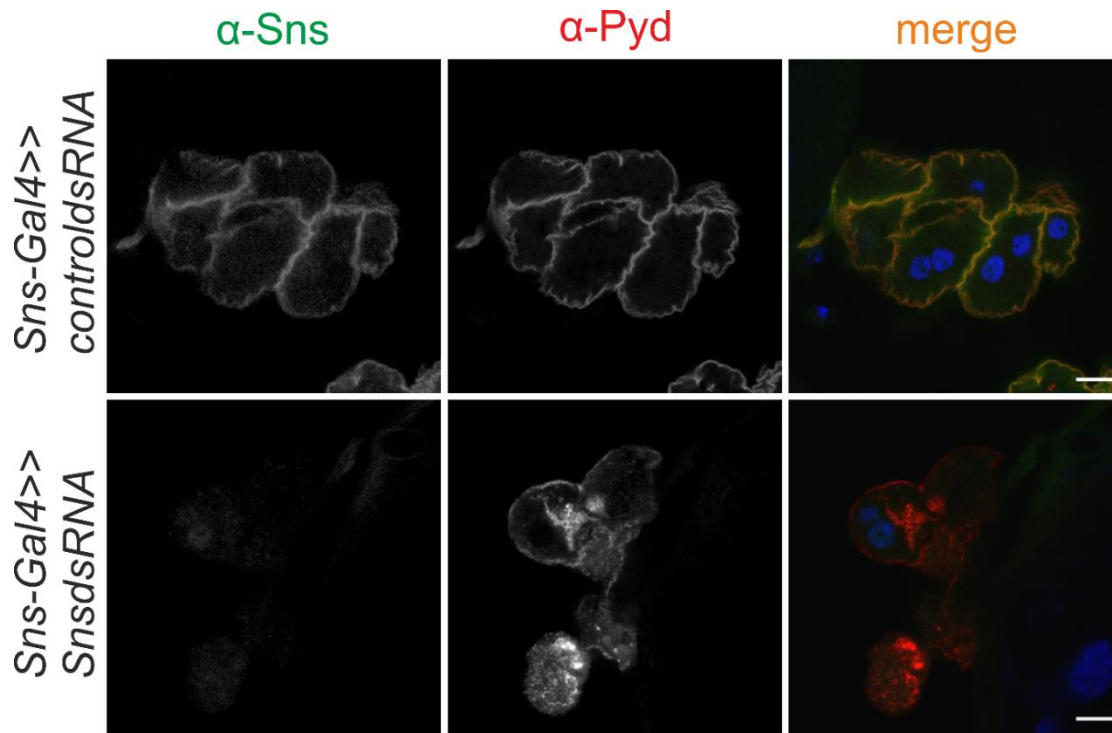

**Supp. Figure 3. Anti-Sns antibody specifically recognizes Sns.**

Immunofluorescence analysis of control (RNAi for *or83b*) or *sns* knockdown nephrocytes is shown. Knockdown in nephrocytes was accomplished by employing *sns-GAL4*. Nephrocytes were prepared and immunofluorescence analysis was performed to test Sns antibody specificity (purified large rabbit bleed). Scale bar: 10  $\mu$ m. n=3.

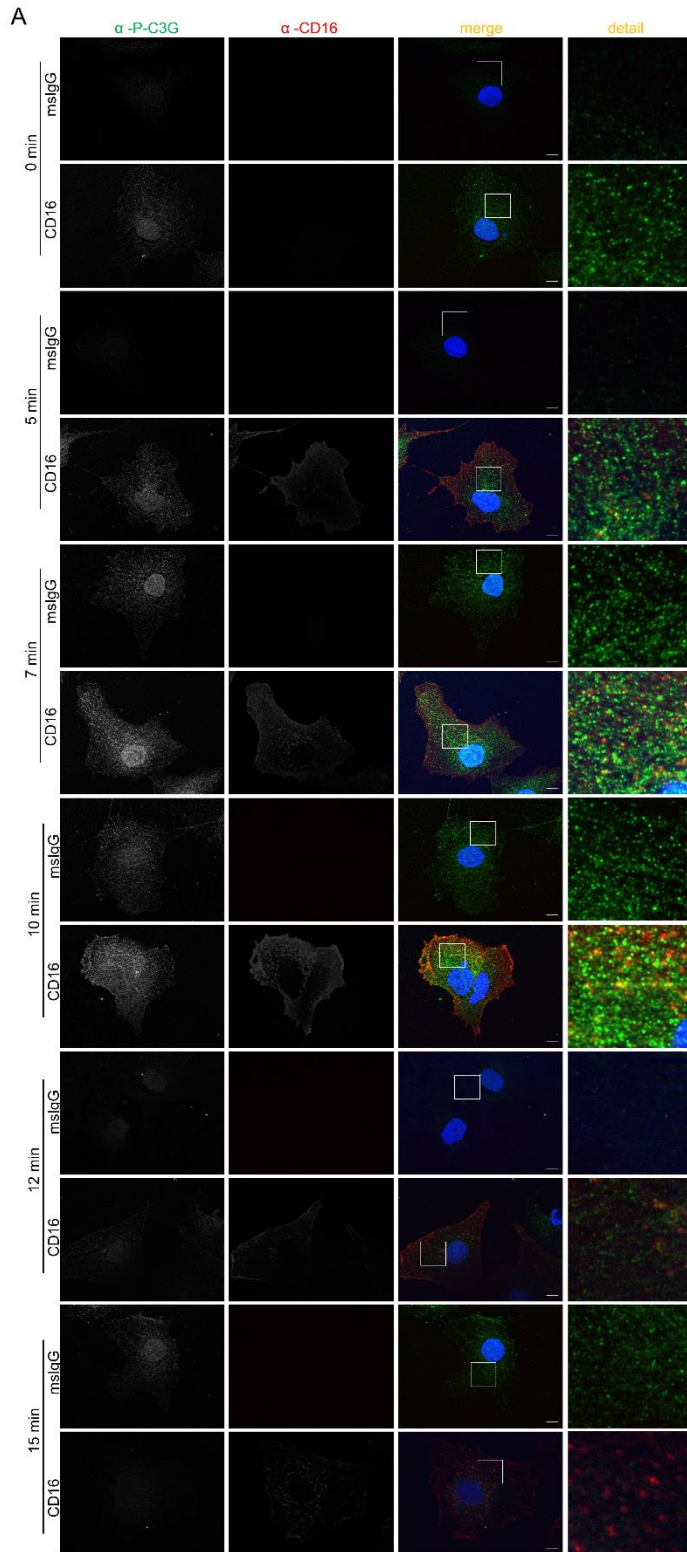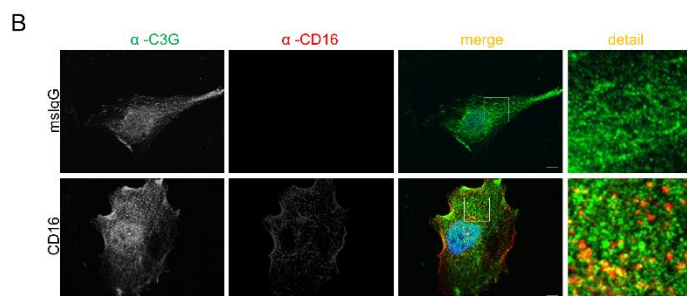

**Supp. Figure 4. Activated Nephrin recruits C3G.**

(A) To assess the time of maximum co-localization of CD16-NCD and p-C3G, podocytes expressing CD16-NCD were incubated with CD16-Alexa<sup>647</sup> or mouse (ms) IgG<sup>647</sup> antibody for the indicated time to induce Nephrin clustering. Cells were fixed, and immunofluorescence analysis was performed with antibody specific for p-C3G. (B) Shown are immunofluorescence analyses of cultured podocytes expressing CD16-NCD that were incubated with anti-CD16 Alexa<sup>647</sup> or ms IgG<sup>647</sup> antibody for 10 minutes to activate Nephrin signaling. After fixing, cells were stained with antibody specific for C3G. Please note that activated Nephrin partly co-localizes with total C3G. Scale bar: 10  $\mu$ m. n=3.

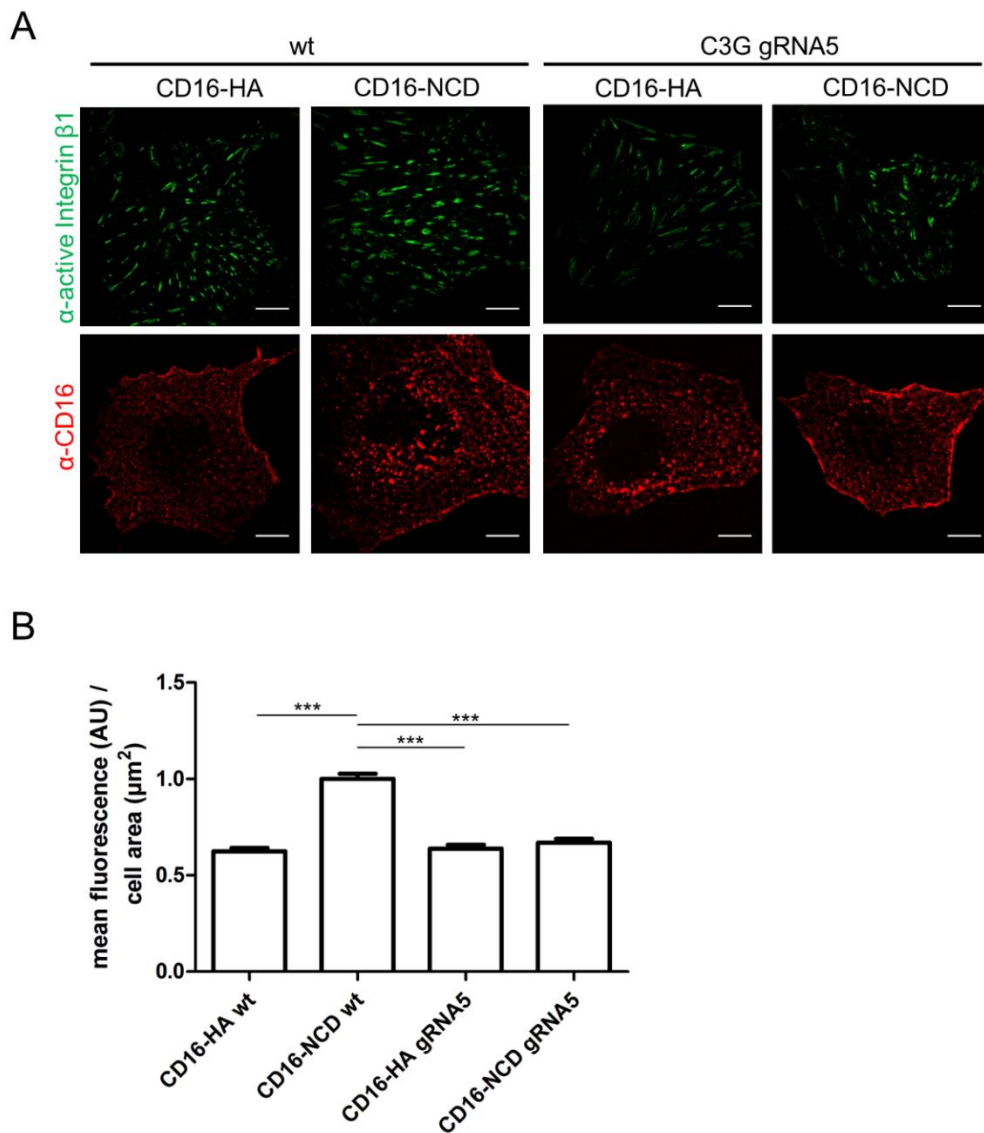

**Supp. Figure 5. Nephrin activation results in Integrin  $\beta$ 1 activation (additional data).**

(A) Control podocytes or C3G KO podocytes (gRNA 5) transiently expressing CD16-NCD or CD16-HA were incubated with anti-CD16-Alexa<sup>647</sup> antibody to initiate Nephrin clustering. Podocytes were fixed, and immunofluorescence analysis was performed employing antibody specific for active Integrin  $\beta$ 1. Scale bar: 10  $\mu\text{m}$ . (B) Statistical analysis of mean fluorescence intensity of active Integrin  $\beta$ 1 in AU (arbitrary units) per  $\mu\text{m}^2$  cell area normalized to control condition. \*\*\*  $P < .001$  by unpaired two-tailed Student's t-test.  $n=3$ , 30 cells per condition were evaluated.

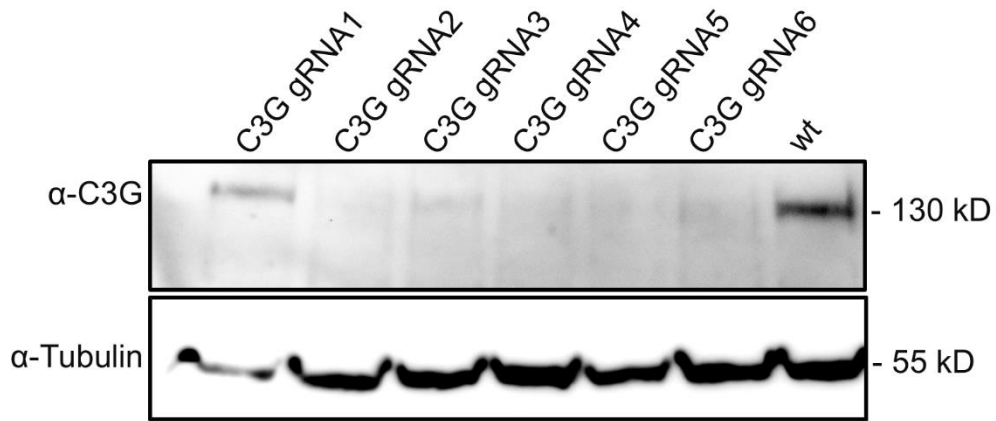

**Supp. Figure 6. C3G knockout in human podocytes.**

Knockout of C3G by *CRISPR/Cas9* was performed in podocytes employing 6 different guide RNAs (gRNA). Immunoblots with lysates of respective podocyte lines are shown using antibody specific for C3G or  $\alpha$ -Tubulin as loading control. Wild-type (wt) podocyte lysate was used as a control.



## Supplemental Tables

**Supp. Table 1. Guide RNA (gRNA) sequences employed for generation of C3G knockout podocytes by CRISPR/Cas9 technology.**

|              |                      |
|--------------|----------------------|
| <i>gRNA1</i> | GCCATGGACACAGGTGAGAG |
| <i>gRNA2</i> | TGCTCCAGATCCAAGGGGAG |
| <i>gRNA3</i> | GCGCTACTTTAAGACCATTG |
| <i>gRNA4</i> | GTCAGCCAGCAAGGTGCTGG |
| <i>gRNA5</i> | GATGGTGACGACTGTGAAGG |
| <i>gRNA6</i> | GCTCCCCCTGACAGACCGCG |

**Supp. Table 2. Genes identified to be necessary for nephrocyte function.**

Flies of the genotype *MHC::ANF-RFP; Hand::GFP; dot-Gal4* were crossed with *UAS-dsRNA* strains. ANF-RFP uptake was assessed by eye and divided into two categories: no effect (-); decreased uptake (+) compared to the control *dsRNA*. Genes are listed with *Drosophila* name, CG number, *dsRNA* reference, name of human ortholog or protein class, and uptake effect.

\*For *Drosophila* proteins without a defined human ortholog the related protein class was listed.

Genes are assigned to groups but may not always belong uniquely to this group.

| <b>Drosophila name</b>           | <b>CG Number</b> | <b>Human ortholog or protein class*</b> | <b>Origin</b> | <b>Effect on ANF-GFP-GFP Uptake</b> |
|----------------------------------|------------------|-----------------------------------------|---------------|-------------------------------------|
| <b>Control</b>                   |                  |                                         |               |                                     |
| <i>Or83b</i>                     | CG10609          |                                         | VDRC #100825  | -                                   |
|                                  |                  |                                         |               |                                     |
| <b>Slit diaphragm-associated</b> |                  |                                         |               |                                     |
| <i>Actinin</i>                   | CG4376           | $\alpha$ -ACTININ2                      | VDRC #7762    | +                                   |
| <i>Actinin</i>                   | CG4376           | $\alpha$ -ACTININ2                      | VDRC #7761    | +                                   |
| <i>cindr</i>                     | CG31012          | CD2AP                                   | VDRC #38854   | +                                   |
| <i>kirre</i>                     | CG3653           | NEPH1                                   | VDRC #6695    | +                                   |
| <i>sns</i>                       | CG33141          | NEPHRIN                                 | VDRC #109442  | +                                   |
|                                  |                  |                                         |               |                                     |
| <b>GTPases/GAPs/GEFs</b>         |                  |                                         |               |                                     |
| <i>Asap1</i>                     | CG30372          | ASAP1-related proteins                  | VDRC #19284   | +                                   |
| <i>Arf51F</i>                    | CG8156           | ARF6                                    | VDRC #100726  | -                                   |
| <i>Cdc42</i>                     | CG12530          | CDC42                                   | VDRC #100794  | -                                   |
| <i>C3G</i>                       | CG42328          | RAPGEF1/C3G                             | VDRC #105664  | +                                   |
| <i>C3G</i>                       | CG42328          | RAPGEF1/C3G                             | VDRC #29829   | +                                   |
| <i>C3G</i>                       | CG42328          | RAPGEF1/C3G                             | VDRC #29828   | +                                   |
| <i>C3G</i>                       | CG42328          | RAPGEF1/C3G                             | VDRC #21306   | +                                   |
| <i>Mig-2-like</i>                | CG5588           | RHOG                                    | VDRC #102528  | +                                   |
| <i>Rac1</i>                      | CG2248           | RAC1                                    | VDRC #2248R-1 | -                                   |
| <i>Rac1</i>                      | CG2248           | RAC1                                    | VDRC #2248R-2 | -                                   |
| <i>Rac1</i>                      | CG2248           | RAC1                                    | VDRC #49246   | -                                   |
| <i>Rac2</i>                      | CG8556           | RAC2                                    | VDRC #28926   | +                                   |
| <i>Rac2</i>                      | CG8556           | RAC2                                    | VDRC #50349   | -                                   |
| <i>Rac2</i>                      | CG8556           | RAC2                                    | VDRC #50350   | -                                   |
| <i>Rap1</i>                      | CG1956           | RAP1                                    | VDRC #33437   | +                                   |
| <i>Rap1</i>                      | CG1956           | RAP1                                    | VDRC #110757  | +                                   |
| <i>Rap1</i>                      | CG1956           | RAP1                                    | VDRC #20761   | +                                   |
| <i>RhoGAPP190</i>                | CG32555          | ARHGAP35                                | VDRC #110213  | -                                   |
| <i>Rho1</i>                      | CG8416           | RHOA                                    | VDRC #3793    | -                                   |
| <i>RhoL</i>                      | CG9366           | RHOB-related proteins                   | VDRC #102461  | -                                   |
| <i>pebble</i>                    | CG8114           | ARHGEF-related proteins                 | VDRC #35349   | -                                   |

|                               |         |                         |               |   |
|-------------------------------|---------|-------------------------|---------------|---|
| <i>schizo</i>                 | CG32434 | ARF6GEF                 | VDRC #36625   | - |
| <i>schizo</i>                 | CG32434 | ARF6GEF                 | VDRC #36627   | - |
| <i>Trio</i>                   | CG18214 | ARHGEF-related proteins | VDRC #40138   | + |
|                               |         |                         |               |   |
| <b>Integrin-associated</b>    |         |                         |               |   |
| <i>Fermitin 1</i>             | CG14991 | FERMT1                  | VDRC #46495   | - |
| <i>Fermitin 1</i>             | CG14991 | FERMT1                  | VDRC #46494   | - |
| <i>Fermitin 2</i>             | CG7729  | FERMT2                  | VDRC #37010   | - |
| <i>Fermitin 2</i>             | CG7729  | FERMT2                  | VDRC #37009   | - |
| <i>inflated</i>               | CG9623  | INTEGRIN $\alpha$       | VDRC #T0530   | - |
| <i>inflated</i>               | CG9623  | INTEGRIN $\alpha$       | VDRC #T0531   | - |
| <i>inflated</i>               | CG9623  | INTEGRIN $\alpha$       | VDRC #9623R-2 | - |
| <i>Integrin linked kinase</i> | CG10504 | ILK                     | VDRC #43170   | + |
| <i>Laminin A</i>              | CG10236 | LAMININ3                | VDRC #18873   | + |
| <i>myospheroid</i>            | CG1560  | INTEGRIN $\beta$        | VDRC #1560R-1 | + |
| <i>myospheroid</i>            | CG1560  | INTEGRIN $\beta$        | VDRC #1560R-2 | + |
| <i>myospheroid</i>            | CG1560  | INTEGRIN $\beta$        | VDRC #K026    | - |
| <i>myospheroid</i>            | CG1560  | INTEGRIN $\beta$        | VDRC #K027    | - |
| <i>p130Cas</i>                | CG1212  | P130CAS                 | VDRC #41479   | - |
| <i>Parvin</i>                 | CG32528 | PARVIN                  | VDRC #11670   | + |
| <i>Parvin</i>                 | CG32528 | PARVIN                  | VDRC #105356  | - |
| <i>Paxillin</i>               | CG31794 | PAXILLIN                | VDRC #25853   | - |
| <i>rhea</i>                   | CG6831  | TALIN                   | VDRC #6831R-2 | - |
| <i>Vinculin</i>               | CG3299  | VINCULIN                | VDRC #34586   | + |
| <i>Vinculin</i>               | CG3299  | VINCULIN                | VDRC #3299R-1 | - |
| <i>Vinculin</i>               | CG3299  | VINCULIN                | VDRC #3299R-2 | - |
| <i>wech</i>                   | CG42396 | TRIM71                  | VDRC #41623   | + |
| <i>wech</i>                   | CG42396 | TRIM71                  | VDRC #106390  | - |
|                               |         |                         |               |   |
| <b>Kinases/Phosphatases</b>   |         |                         |               |   |
| <i>Akt1</i>                   | CG4006  | AKT1                    | VDRC #103703  | - |
| <i>csk</i>                    | CG42317 | CSK                     | VDRC #32877   | + |
| <i>csk</i>                    | CG42317 | CSK                     | VDRC #48281   | + |
| <i>csk</i>                    | CG42317 | CSK                     | VDRC #102313  | - |
| <i>Fak56D</i>                 | CG10023 | FAK                     | VDRC #17957   | + |
| <i>Fak56D</i>                 | CG10023 | FAK                     | VDRC #108608  | - |
| <i>Pak</i>                    | CG10295 | PAK                     | VDRC #12553   | - |
| <i>Pak</i>                    | CG10295 | PAK                     | VDRC #12553   | - |
| <i>Pi3K 21B</i>               | CG4141  | PI3K-related proteins   | VDRC #104179  | + |
| <i>Pi3K 68D</i>               | CG11621 | PI3K-related proteins   | VDRC #109582  | - |
| <i>Pi3K 68D</i>               | CG11621 | PI3K-related proteins   | VDRC #16233   | - |
| <i>Pi3K 92E</i>               | CG4141  | PI3K-related proteins   | VDRC #107390  | - |
| <i>Pi3K 92E</i>               | CG4141  | PI3K-related proteins   | VDRC #38985   | - |
| <i>Pten</i>                   | CG5671  | PTEN                    | VDRC #35731   | - |
| <i>rolled</i>                 | CG12559 | MAPK-related proteins   | VDRC #109108  | - |
| <i>rolled</i>                 | CG12559 | MAPK-related proteins   | VDRC #432123  | - |
| <i>rolled</i>                 | CG12559 | MAPK-related proteins   | BDSC #34855   | - |
| <i>slingshot</i>              | CG6238  | SSH2, SSH3              | VDRC #30136   | + |
| <i>Src42A</i>                 | CG44128 | FRK                     | VDRC #17643   | + |
| <i>Src42A</i>                 | CG44128 | FRK                     | VDRC #17644   | + |

|                         |         |            |              |   |
|-------------------------|---------|------------|--------------|---|
| <i>Src64B</i>           | CG7524  | SRC        | VDRC #35352  | + |
| <i>Twinstar</i>         | CG4254  | COFILIN    | VDRC #110599 | + |
|                         |         |            |              |   |
| <b>Actin-associated</b> |         |            |              |   |
| <i>capulet</i>          | CG33979 | CAP1, CAP2 | VDRC #21995  | - |
| <i>capulet</i>          | CG33979 | CAP1, CAP2 | VDRC #101588 | - |
| <i>Ced-12</i>           | CG5336  | ELMO       | VDRC #10455  | + |
| <i>diaphanous</i>       | CG1768  | DIAPH      | VDRC #20518  | - |
| <i>enabled</i>          | CG15112 | ENAH       | VDRC #43058  | - |
| <i>enabled</i>          | CG15112 | ENAH       | VDRC #43056  | - |
| <i>formin 3</i>         | CG33556 | INF2       | VDRC #45594  | - |
| <i>nervous wreck</i>    | CG43479 | FCHSD2     | VDRC #44282  | - |
| <i>shroom</i>           | CG34379 | SHROOM2    | VDRC #107966 | - |
| <i>shroom</i>           | CG34379 | SHROOM2    | VDRC #100672 | - |
| <i>spaghetti squash</i> | CG3595  | MYL9       | VDRC #7916   | + |
| <i>spaghetti squash</i> | CG3595  | MYL9       | VDRC #7917   | + |
| <i>zipper</i>           | CG15792 | MYH10      | VDRC #7819   | - |

**Supp. Table 3. Nomenclature of mouse Nephrin tyrosine (Y) residues.**

| Y#  | Tyrosine # |
|-----|------------|
| Y1  | Y1128      |
| Y2  | Y1153      |
| Y3  | Y1154      |
| Y4  | Y1172      |
| Y5  | Y1191      |
| Y6  | Y1198      |
| Y7  | Y1208      |
| Y8  | Y1216      |
| Y9  | Y1225      |
| Y10 | Y1232      |
